# Supplementary material for: Ultra-micropores of hard carbons for ultrafast Na-ion storage
Source: Royal Society of Chemistry journal article supplement (doi:10.1039/d4ta08291e), 2025-01-01
Supplement: d4ta08291e1.pdf [file d4ta08291e1.pdf]

*Supporting Information for*

**Ultra-Micropores of Hard Carbons for Ultrafast Na-ion Storage**

*Hu Zhang,<sup>ab</sup> Jian Yin,<sup>b\*</sup> Dandan Ouyang,<sup>b</sup> Yu Liu,<sup>bc</sup> Ruiyao Wu,<sup>b</sup> Rui Zhang,<sup>b</sup> Ruiqiang Huo,<sup>bc</sup> Gaixiu Yang,<sup>d</sup> Yanjun Cai,<sup>a\*</sup> and Jiao Yin<sup>b\*</sup>*

*<sup>a</sup>College of Chemistry and Chemical Engineering, Xinjiang Key Laboratory of Energy Storage and Photoelectrolytic Materials*

*Xinjiang Normal University*

*Urumqi, 830054, Xinjiang, P. R. China*

*E-mails: [cjxjsf@yeah.net](mailto:cjxjsf@yeah.net)*

*<sup>b</sup>Xinjiang Key Laboratory of Separation Material and Technology*

*Xinjiang Technical Institute of Physics and Chemistry*

*Chinese Academy of Sciences*

*Urumqi, 830011, China*

*E-mails: [yinjian@ms.xjb.ac.cn](mailto:yinjian@ms.xjb.ac.cn); [yinjiao@ms.xjb.ac.cn](mailto:yinjiao@ms.xjb.ac.cn)*

*<sup>c</sup>Center of Material Science and Opto-electronic Technology*

*University of Chinese Academy of Sciences*

*Beijing 100049, China*

*<sup>d</sup>CAS Key Laboratory of Renewable Energy Guangdong Provincial Key Laboratory of New and Renewable Energy Research and Development*

*Guangzhou Institute of Energy Conversion*

*Chinese Academy of Sciences*

*Guangzhou, 510640, China*

## Supporting Figures

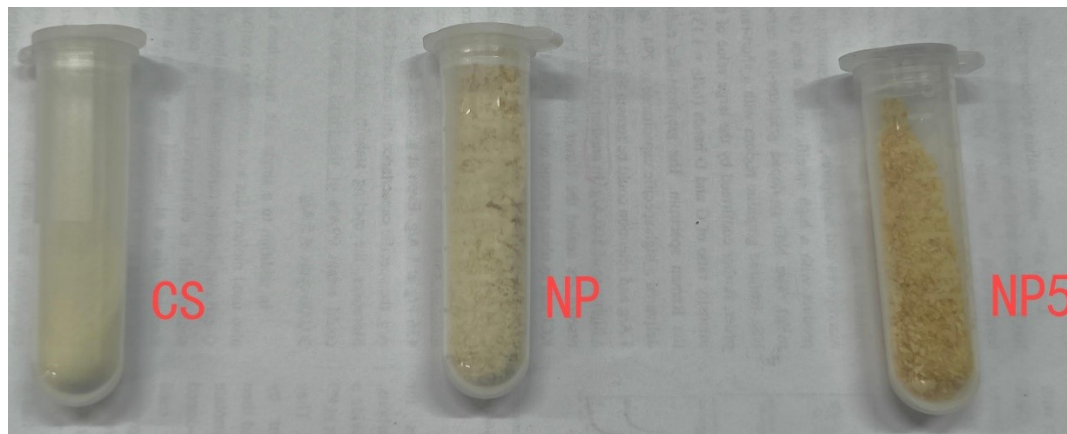

**Fig. S1** Macroscopic morphology of CS, NP, and NP5.

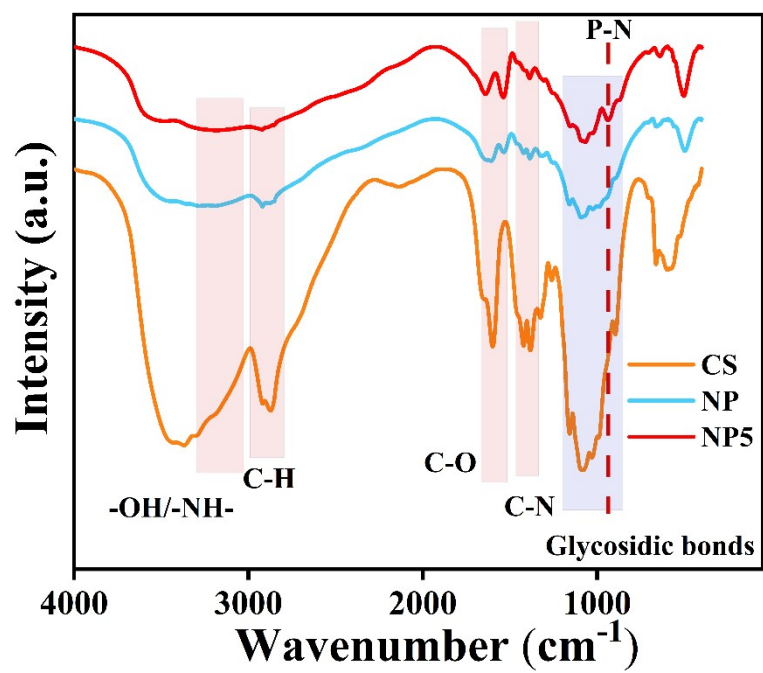

Fig. S2 FT-IR of CS, NP, and NP5.

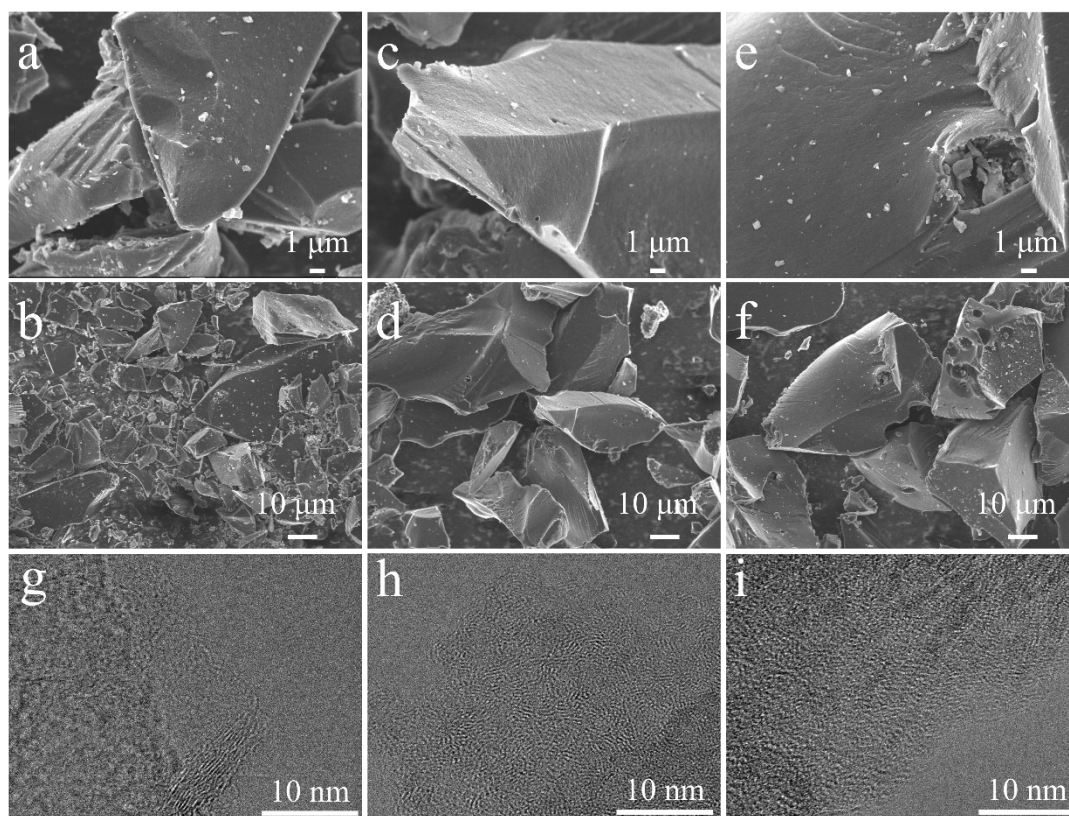

**Fig. S3** SEM images of NP1 (a-b), NP3 (c-d) and NP7 (e-f), TEM images of CS, NP and NP5.

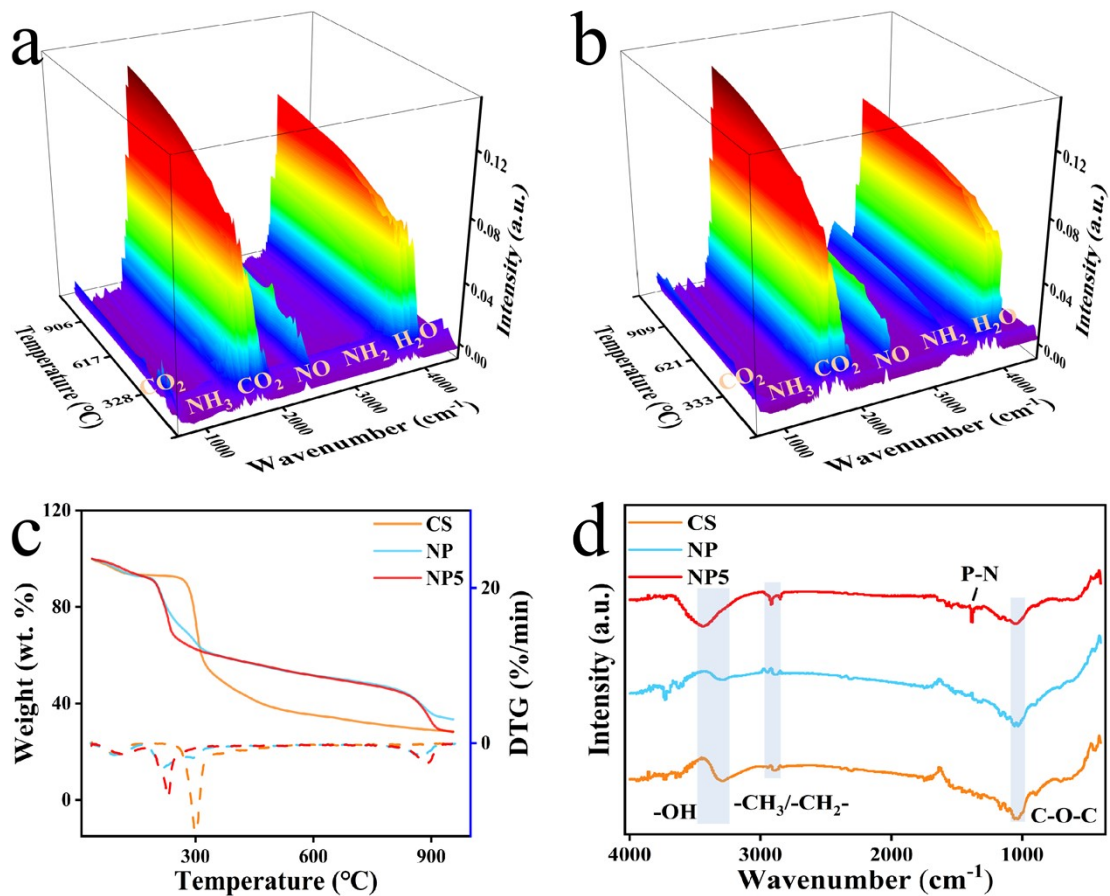

**Fig. S4** The In-situ TG-IR curves of the two samples (a) CS, (b) NP. The TGA curves of the three samples CS (c). The FTIR curves of the three samples (d).

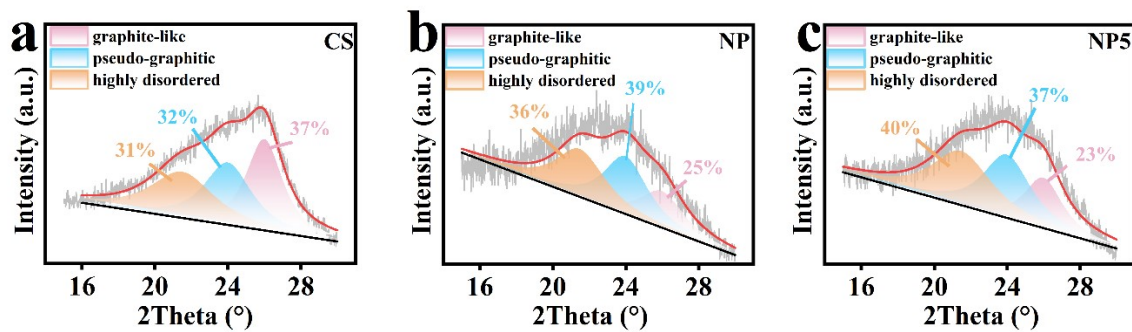

**Fig. S5** Evolution of microstructures examined by the deconvolution of (002) XRD planes: (a) CS, (b) NP, (c) NP5.

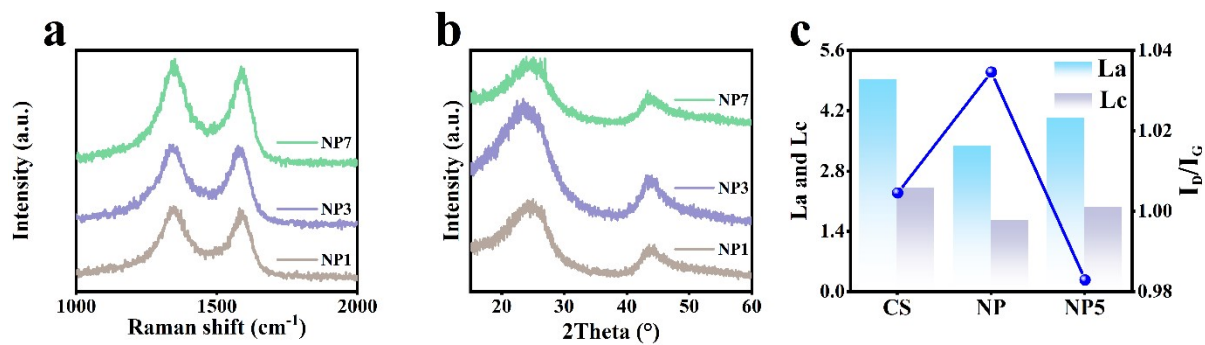

**Fig. S6** Raman images of NP1, NP3 and NP7 (a). XRD images of NP1, NP3 and NP7 (b). The values of the  $I_D/I_G$  and La, Lc (c).

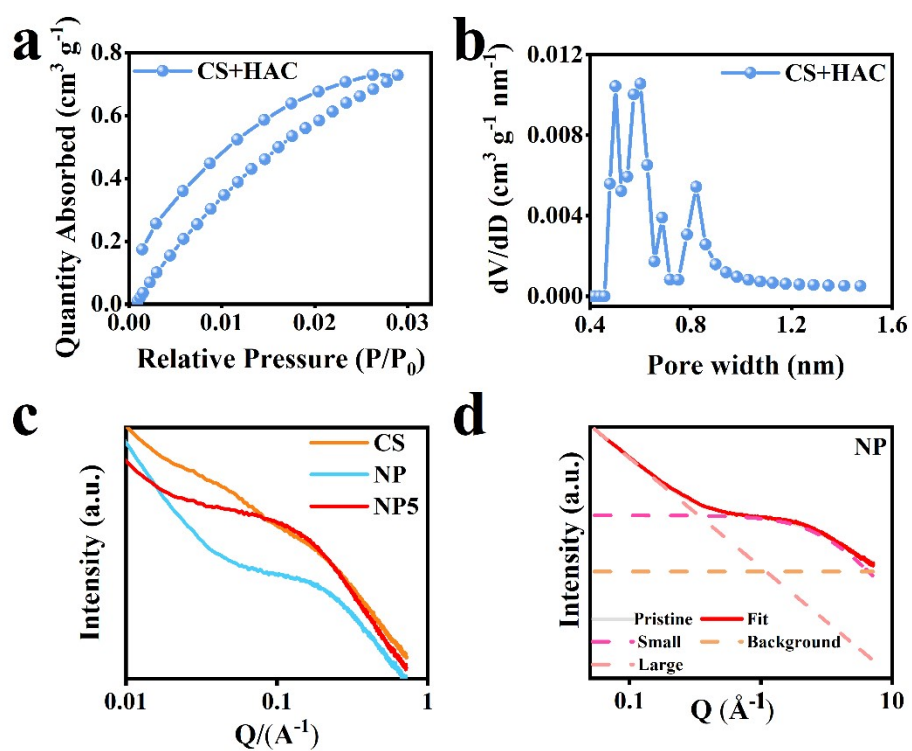

**Fig. S7** CO<sub>2</sub> adsorption-desorption isotherms of CS+HAC (a). Pore size distribution of CS+HAC (b). SAXS patterns of CS, NP and NP5 (c). Fitted SAXS patterns of NP (d).



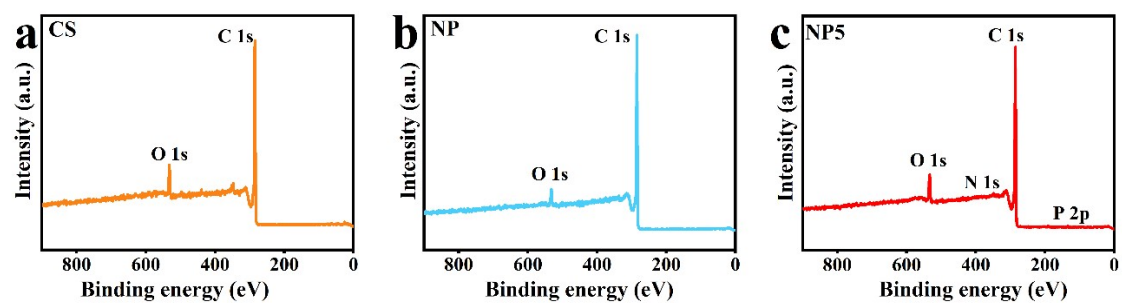

**Fig. S8** XPS survey spectra of samples: (a) CS, (b) NP and (c) NP5.

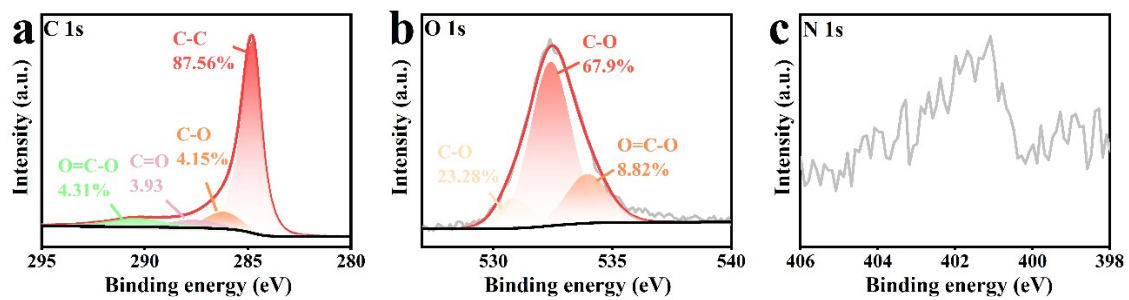

**Fig. S9** XPS spectra of CS: (a) C 1s, (b) O 1s and (c) N 1s.

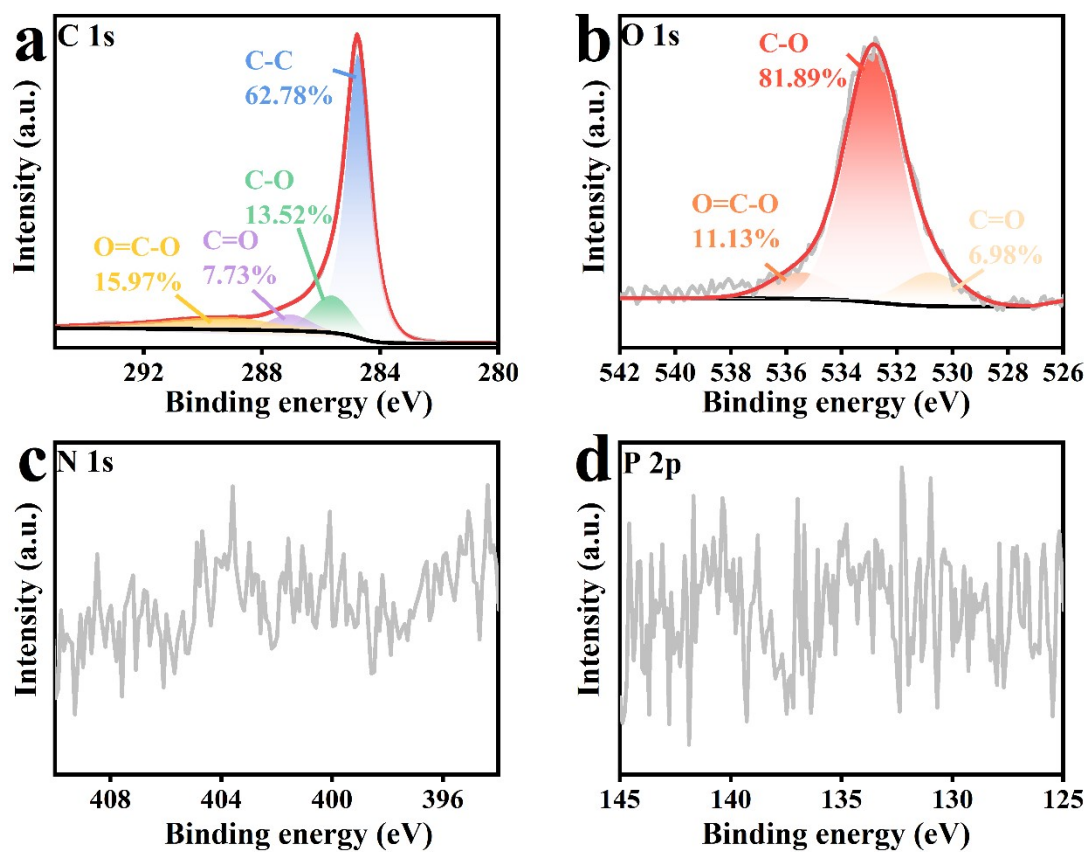

Fig. S10 XPS spectra of NP: (a) C 1s, (b) O 1s, (c) N 1s and (d) P 2p.

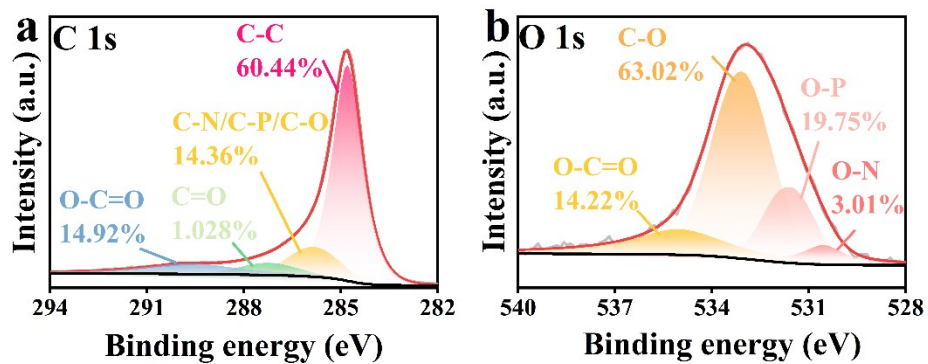

Fig. S11 XPS spectra of NP5: a) C 1s, b) O 1s.

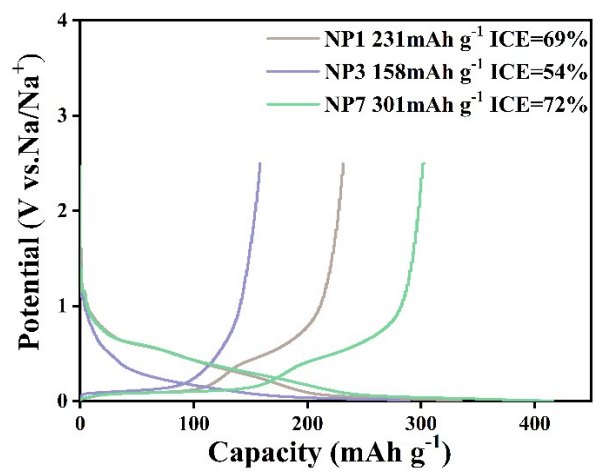

**Fig. S12** First Charge/discharge curves for NP1, NP3 and NP7 at 0.02 A g<sup>-1</sup>.

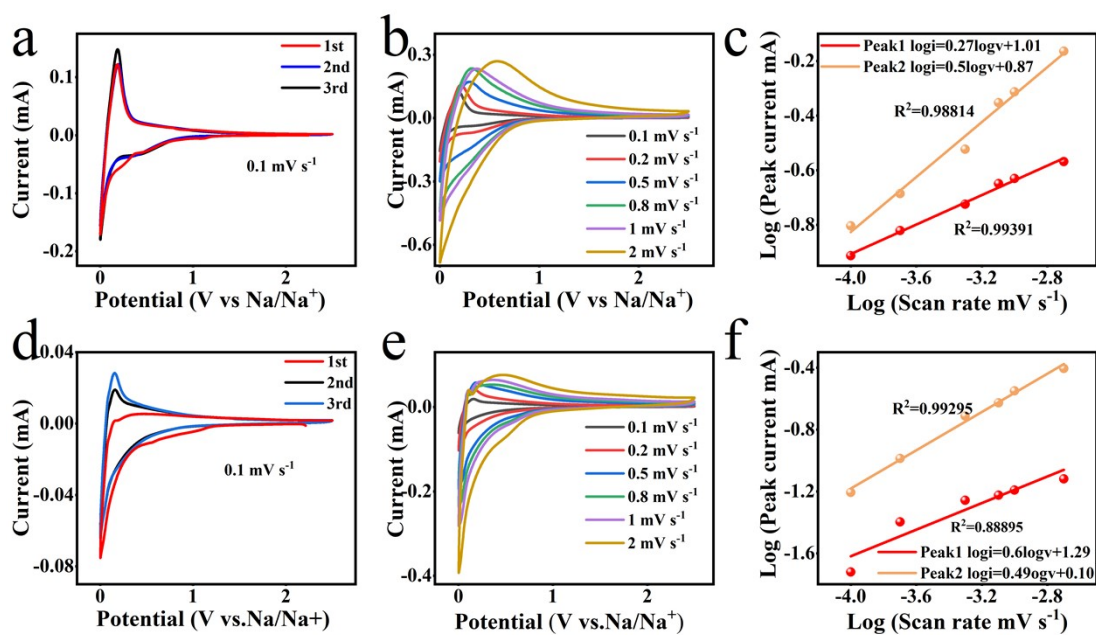

**Fig. S13** the CV curves at  $0.1 \text{ mV s}^{-1}$  for CS (a) and NP (d), CV curves for CS (b) and NP (e), b-value derived from the currents of anodic and cathodic peaks at various scan rates for CS (c) and NP (f).

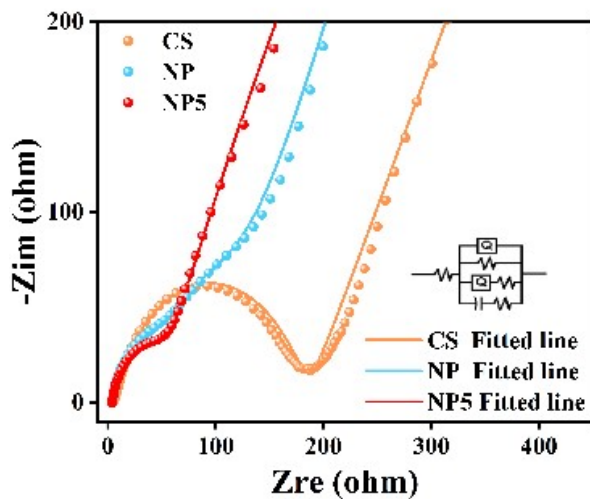

**Fig. S14** Nyquist plots.

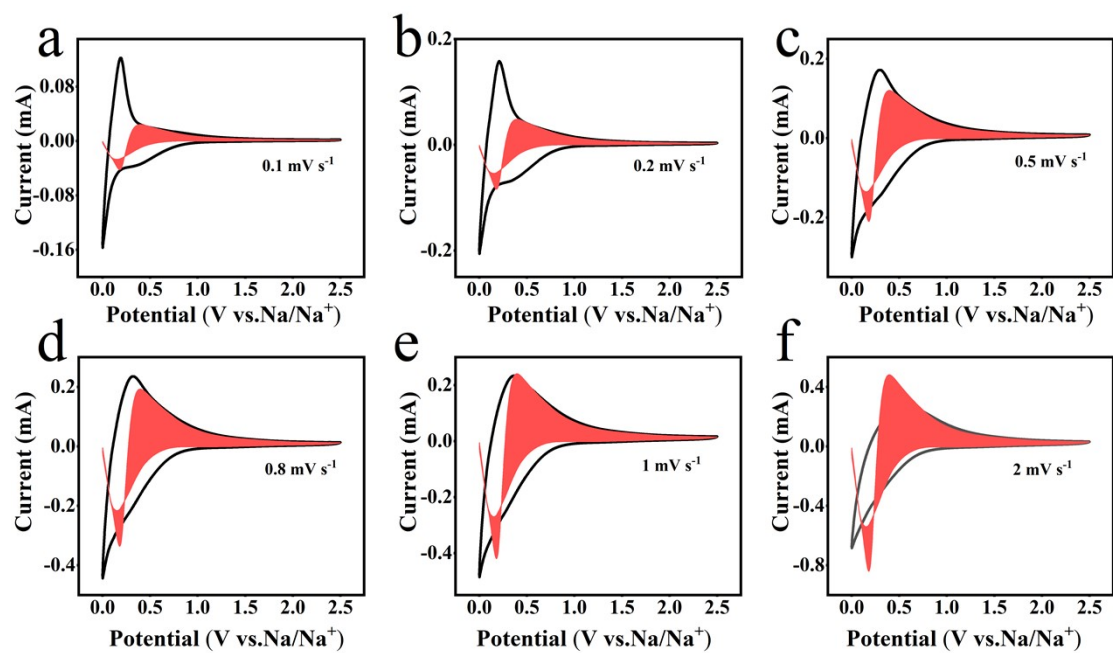

**Fig. S15** The capacitive contribution for CS at 0.1-2 mV s<sup>-1</sup>.

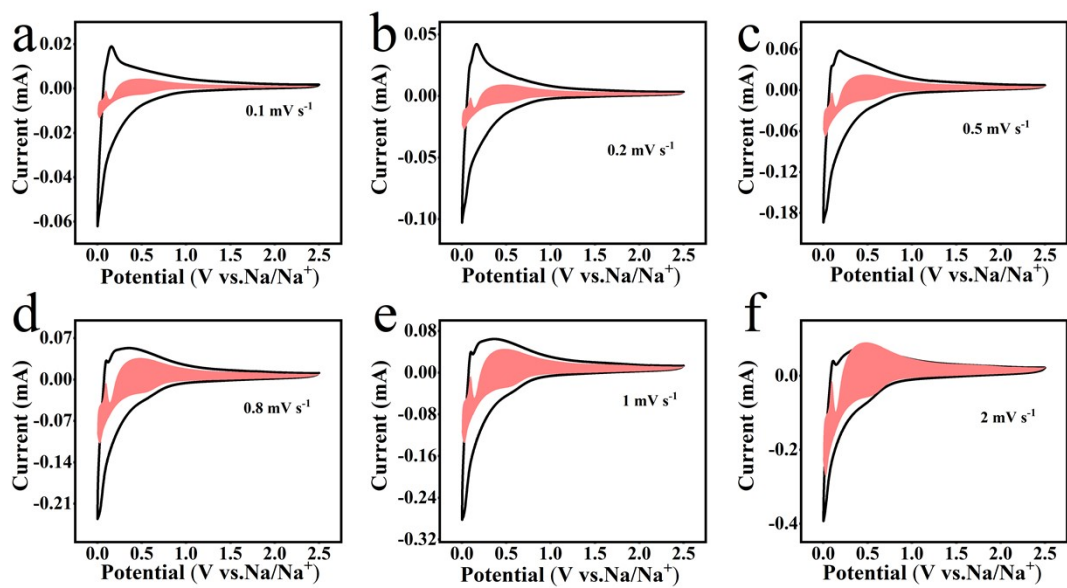

**Fig. S16** The capacitive contribution for NP at 0.1-2 mV s<sup>-1</sup>.



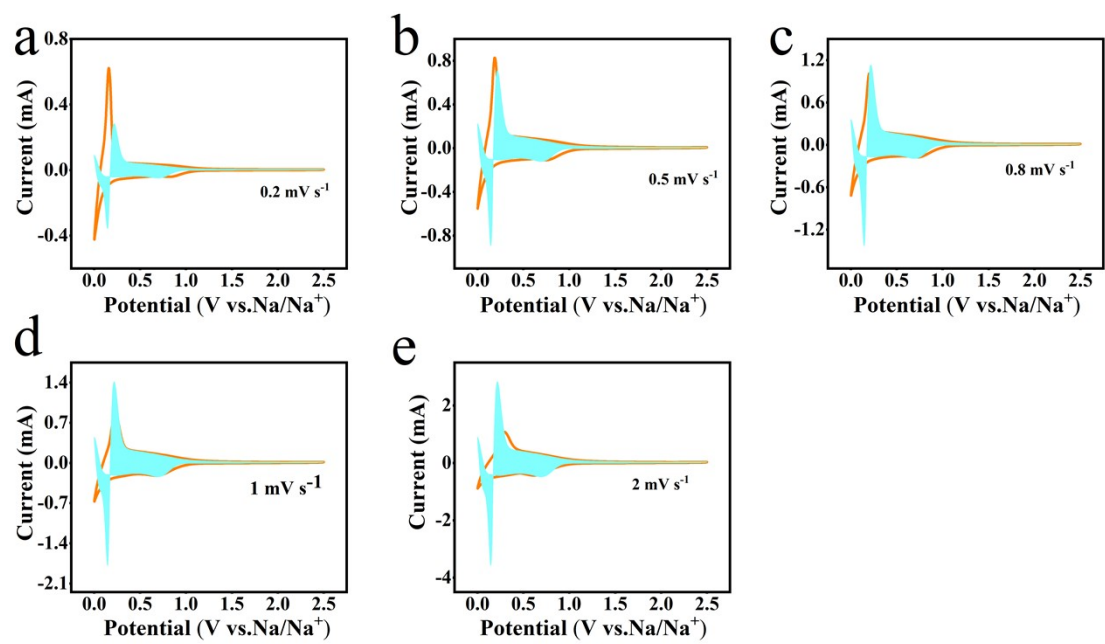

**Fig. S17** The capacitive contribution for NP5 at 0.2-2 mV s<sup>-1</sup>.

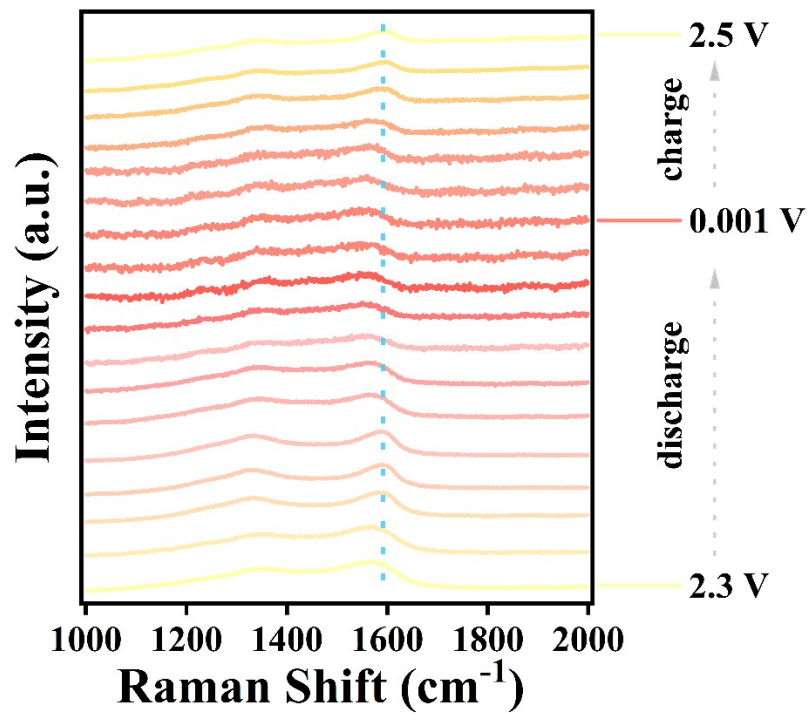

**Fig. S18** The in-situ Raman spectra.

## Supporting Tables

**Table S1** Physical parameters of different hard carbons from the XRD spectra.

|          |                   | CS | NP | NP5 |
|----------|-------------------|----|----|-----|
| Area (%) | Highly disordered | 31 | 36 | 40  |
|          | Pseudo-graphitic  | 32 | 39 | 37  |
|          | Graphite-like     | 37 | 25 | 23  |

**Table S2** Physical parameters of different hard carbons.

|     | La (nm) | Lc (nm) | d002 (nm) | I <sub>D</sub> /I <sub>G</sub> |
|-----|---------|---------|-----------|--------------------------------|
| CS  | 4.94    | 2.42    | 0.35      | 0.98                           |
| NP  | 3.39    | 1.66    | 0.37      | 1.03                           |
| NP1 | 3.72    | 1.82    | 0.36      | 1.01                           |
| NP3 | 3.19    | 1.56    | 0.37      | 1.00                           |
| NP5 | 4.04    | 1.98    | 0.39      | 1.00                           |
| NP7 | 2.91    | 1.42    | 0.36      | 0.93                           |

**Table S3** Pore structural parameters of CS, NP and NP5.

|     | Specific Surface       | Pore Volume          | Specific Surface        | Pore Volume          |
|-----|------------------------|----------------------|-------------------------|----------------------|
|     | Area (N <sub>2</sub> ) | (N <sub>2</sub> )    | Area (CO <sub>2</sub> ) | (CO <sub>2</sub> )   |
|     | (m <sup>2</sup> /g)    | (cm <sup>3</sup> /g) | (m <sup>2</sup> /g)     | (cm <sup>3</sup> /g) |
| CS  | 12.568                 | 0.012                | 11.475                  | 0.004                |
| NP  | 16.289                 | 0.017                | 76.751                  | 0.028                |
| NP5 | 423.602                | 0.187                | 578.291                 | 0.194                |

**Table S4** CS, NP and NP5 in 0.4-0.8 nm pore volume.

|     | Pore Volume (N <sub>2</sub> ) | Pore Volume (CO <sub>2</sub> ) |
|-----|-------------------------------|--------------------------------|
|     | (cm <sup>3</sup> /g)          | (cm <sup>3</sup> /g)           |
| CS  | 0                             | 0.002                          |
| NP  | 0                             | 0.017                          |
| NP5 | 0.092                         | 0.136                          |

**Table S5** Percentage composition after peak split fitted XPS.

|      |                | CS    | NP    | NP5   |
|------|----------------|-------|-------|-------|
| C 1s | C-C            | 87.59 | 62.78 | 60.44 |
|      | C-O (C-N, C-P) | 4.15  | 13.52 | 14.36 |
|      | C=O            | 3.93  | 7.73  | 1.028 |
|      | O=C-O          | 4.31  | 15.97 | 14.92 |
| O 1s | C=O            | 23.28 | 6.98  |       |
|      | C-O            | 67.9  | 81.89 | 63.02 |
|      | O=C-O          | 8.82  | 11.13 | 14.22 |
|      | O-N            |       |       | 3.01  |
| N 1s | O-P            |       |       | 19.75 |
|      | N-O            |       |       | 8.59  |
|      | N-Q            |       |       | 31.63 |
|      | N-P            |       |       | 30.49 |
|      | N-5            |       |       | 9.83  |
|      | N-6            |       |       | 19.46 |
| P 2p | O-P            |       |       | 33.17 |
|      | N-P            |       |       | 33.66 |
|      | C-P            |       |       | 33.17 |

**Table S6** Na-ion storage performance of NP-X hard carbons.

|     | Capacity  | ICE | plateau capacity | slope capacity |
|-----|-----------|-----|------------------|----------------|
| CS  | 181 mAh/g | 56% | 49 mAh/g         | 108 mAh/g      |
| NP  | 222 mAh/g | 44% | 99 mAh/g         | 107 mAh/g      |
| NP1 | 231 mAh/g | 69% | 81 mAh/g         | 150 mAh/g      |
| NP3 | 158 mAh/g | 54% | 30 mAh/g         | 128 mAh/g      |
| NP5 | 386 mAh/g | 73% | 173 mAh/g        | 213 mAh/g      |
| NP7 | 301 mAh/g | 72% | 96 mAh/g         | 205 mAh/g      |

**Table S7** Comparison of the slope capacities and plateau capacities of hard carbons.

|   | Capacity                | Slope capacity          | Plateau capacity        | Journals                          |
|---|-------------------------|-------------------------|-------------------------|-----------------------------------|
| 1 | 302 mAh g <sup>-1</sup> | 152 mAh g <sup>-1</sup> | 101 mAh g <sup>-1</sup> | Small <sup>1</sup>                |
| 2 | 346 mAh g <sup>-1</sup> | 117 mAh g <sup>-1</sup> | 108 mAh g <sup>-1</sup> | Nano Micro Lett. <sup>2</sup>     |
| 3 | 323 mAh g <sup>-1</sup> | 135 mAh g <sup>-1</sup> | 232 mAh g <sup>-1</sup> | Energy Storage Mater <sup>3</sup> |
| 4 | 417 mAh g <sup>-1</sup> | 100 mAh g <sup>-1</sup> | 317 mAh g <sup>-1</sup> | Energy Storage Mater <sup>4</sup> |
| 5 | 279 mAh g <sup>-1</sup> | 156 mAh g <sup>-1</sup> | 123 mAh g <sup>-1</sup> | Carbon <sup>5</sup>               |
| 6 | 361 mAh g <sup>-1</sup> | 129 mAh g <sup>-1</sup> | 171 mAh g <sup>-1</sup> | Chem. Eng. J. <sup>6</sup>        |
| 8 | 326 mAh g <sup>-1</sup> | 262 mAh g <sup>-1</sup> | 64 mAh g <sup>-1</sup>  | Adv. Mater. <sup>7</sup>          |
| 9 | 386 mAh g <sup>-1</sup> | 173 mAh g <sup>-1</sup> | 213 mAh g <sup>-1</sup> | This work                         |

**Table S8** Comparison of the physical properties and Na-ion storage performance of hard carbon anodes.

| Name     | SSA<br>(m <sup>2</sup> /g) | Capacity<br>(mAh g <sup>-1</sup> ) | Rate Capability<br>(mAh g <sup>-1</sup> ) | ICE<br>(%) | Cycle Life                                                                         | Journals                             |
|----------|----------------------------|------------------------------------|-------------------------------------------|------------|------------------------------------------------------------------------------------|--------------------------------------|
| L6-1300  | 2.51                       | 305 @0.1C                          | 174 @ 5C                                  | 85         | 87.5% retention over 500 cycles, 237<br>mAh g <sup>-1</sup> @1C                    | Small <sup>1</sup>                   |
| ACGC900  | 19.4                       | 346 @30 mA g <sup>-1</sup>         | 192 @ 1 A g <sup>-1</sup>                 | 80         | 90% retention over 200 cycles, 252<br>mAh g <sup>-1</sup> @50 mA g <sup>-1</sup>   | Nano Micro Lett. <sup>2</sup>        |
| PCBC125  | 76.19                      | 330 @20 mA g <sup>-1</sup>         | 182 @ 1 A g <sup>-1</sup>                 | 89         | 96% retention over 300 cycles, 252<br>mAh g <sup>-1</sup> @100 mA g <sup>-1</sup>  | Energy Storage<br>Mater <sup>3</sup> |
| VHC-1200 | 227.57                     | 260 @100 mA g <sup>-1</sup>        | 206 @ 1 A g <sup>-1</sup>                 | 72         | 82% retention over 1000 cycles, 200<br>mAh g <sup>-1</sup> @500 mA g <sup>-1</sup> | Carbon <sup>5</sup>                  |
| HHC      | 7                          | 279 @20 mA g <sup>-1</sup>         | 132 @ 1 A g <sup>-1</sup>                 | 70         | 85% retention over 500 cycles, 162<br>mAh g <sup>-1</sup> @1 A g <sup>-1</sup>     | Carbon Energy <sup>8</sup>           |
| HC-DB-6  | 82                         | 350 @20 mA g <sup>-1</sup>         | 83 @ 1 A g <sup>-1</sup>                  | 86         | 96% retention over 100 cycles, 270<br>mAh g <sup>-1</sup> @100 mA g <sup>-1</sup>  | Adv. Mater. <sup>9</sup>             |
| NP5      | 578.291                    | 386 @20 mA g <sup>-1</sup>         | 151 @ 1 A g <sup>-1</sup>                 | 73         | 85% retention over 2000 cycles, 180<br>mAh g <sup>-1</sup> @1 A g <sup>-1</sup>    | This work                            |

**Table S9** Electrode parameters and diffusion coefficient for CS, NP and NP5 anode.

| Samples | $R_s$ ( $\Omega$ ) | $R_{ct}$ ( $\Omega$ ) |
|---------|--------------------|-----------------------|
| CS      | 5.568              | 178.9                 |
| NP      | 4.317              | 137.8                 |
| NP5     | 4.204              | 98.35                 |

**Table S10** Percentage of capacitive contribution at different sweep speeds.

|     | 0.1 mV s <sup>-1</sup> | 0.2 mV s <sup>-1</sup> | 0.5 mV s <sup>-1</sup> | 0.8 mV s <sup>-1</sup> | 1 mV s <sup>-1</sup> | 2 mV s <sup>-1</sup> |
|-----|------------------------|------------------------|------------------------|------------------------|----------------------|----------------------|
| CS  | 27.08                  | 32.55                  | 44.63                  | 48.46                  | 54.55                | 80.61                |
| NP  | 30.32                  | 31.73                  | 40.32                  | 52.84                  | 55.32                | 81.22                |
| NP5 | 33.53                  | 41.13                  | 52.40                  | 56.57                  | 62.73                | 74.24                |

## References

- 1 Z. Tang, D. Jiang, Z. Fu, J. Zhou, R. Liu, R. Zhang, D. Sun, A. S. Dhmees, Y. Tang and H. Wang, *Small Methods*, 2024, 2400509
- 2 J. Yang, X. Wang, W. Dai, X. Lian, X. Cui, W. Zhang, K. Zhang, M. Lin, R. Zou, K. P. Loh, Q. H. Yang and W. Chen, *Nano Micro Lett.*, 2020, **13**, 98.
- 3 G. Zhao, T. Xu, Y. Zhao, Z. Yi, L. Xie, F. Su, Z. Yao, X. Zhao, J. Zhang, W. Xie, X. Li, L. Dong and C.-M. Chen, *Energy Storage Mater.*, 2024, **67**, 103282.
- 4 X. Zhao, P. Shi, H. Wang, Q. Meng, X. Qi, G. Ai, F. Xie, X. Rong, Y. Xiong, Y. Lu and Y.-S. Hu, *Energy Storage Mater.*, 2024, **70**, 103543.
- 5 G. Pan, R. Zhao, Z. Huang, C. Cui, F. Wang, Y. Gu, Y. Gao, Z. Sun and T. Zhang, *Carbon*, 2024, **224**, 118955.
- 6 X. Zhang, R. Duan, T. Zheng, P. Chen, X. Yu, Z. Qiao and D. Ruan, *Chem. Eng. J.*, 2024, **498**, 155232.
- 7 J. Xia, D. Yan, L. Guo, X. Dong, W. C. Li and A. H. Lu, *Adv. Mater.*, 2020, **32**, 2000447.
- 8 Y. Qiu, G. Jiang, Y. Su, X. Zhang, Y. Du, X. Xu, Q. Ye, J. Zhang, M. Ban, F. Xu and H. Wang, *Carbon Energy*, 2024, **6**, 479-491.
- 9 Y. Wang, Z. Yi, L. Xie, Y. Mao, W. Ji, Z. Liu, X. Wei, F. Su and C. M. Chen, *Adv. Mater.*, 2024, **36**, 2401249.
